# Supplementary material
Source: Springer Nature journal article supplement (https://www.springermedizin.de/resource/supplementary/12877_2009_303_MOESM3_ESM.pdf/9439344)
Supplement: MOESM3 [file 9439344]

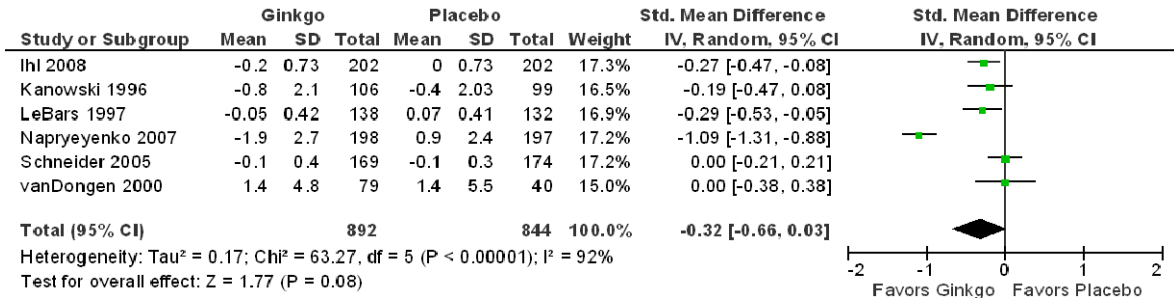

**ITT=intent-to-treat; LOCF=last observation carried forward; SD=standard deviation; 95% CI=95% confidence interval.**
